# Supplementary material for: Muscle Loss after Chemoradiotherapy as a Biomarker of Distant Failures in Locally Advanced Cervical Cancer
Source: PubMed Central journal article supplement (PMC7139727; doi:10.3390/cancers12030595), 2020-03-05
Supplement: cancers-12-00595-s001.pdf [file cancers-12-00595-s001.pdf]

# Muscle Loss after Chemoradiotherapy as a Biomarker of Distant Failures in Locally Advanced Cervical Cancer

Jie Lee, Jhen-Bin Lin, Meng-Hao Wu, Chih-Long Chang, Ya-Ting Jan and Yu-Jen Chen

## Supplementary Materials

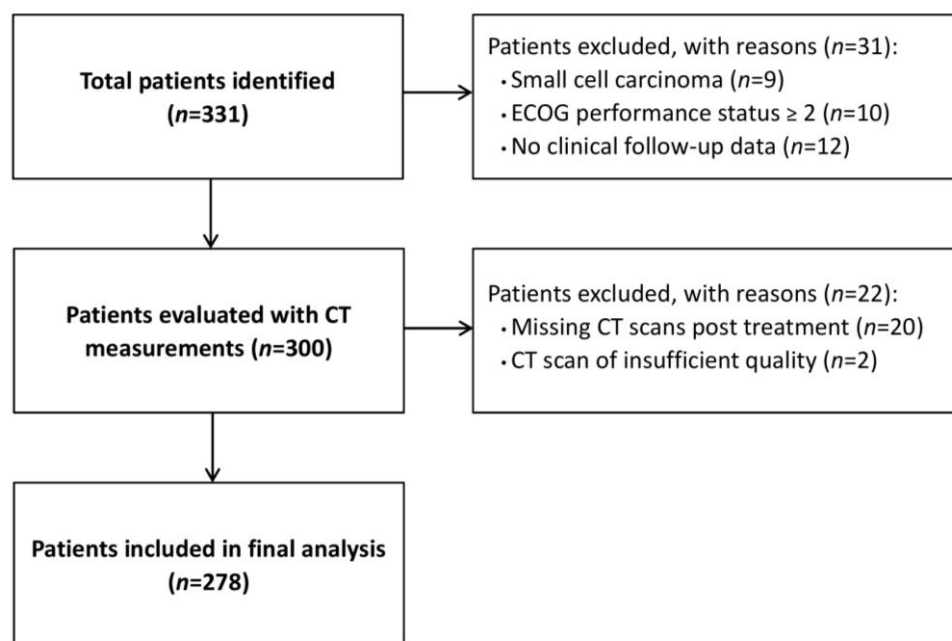

Supplementary Figure S1. Flow chart for patient inclusion.

Supplementary Table S1. Body composition parameters according to SMI change groups, values expressed as mean  $\pm$  standard deviation, unless stated otherwise.

| Characteristics                                          | Overall<br>(n = 278) | SMI loss<br>(n = 90) | SMI maintained<br>(n = 188) | p-value |
|----------------------------------------------------------|----------------------|----------------------|-----------------------------|---------|
| <b>Pre-treatment BMI (kg/m<sup>2</sup>)</b>              | 23.4 $\pm$ 4.3       | 23.4 $\pm$ 4.8       | 23.4 $\pm$ 4.1              | 0.90    |
| <b>Weight loss <math>\geq</math> 5%, n (%)</b>           | 58 (20.9)            | 24 (26.7)            | 34 (18.1)                   | 0.10    |
| <b>Pre-treatment SMI (cm<sup>2</sup>/m<sup>2</sup>)</b>  | 39.8 $\pm$ 7.3       | 40.6 $\pm$ 7.0       | 39.4 $\pm$ 7.4              | 0.20    |
| Pre-treatment sarcopenia <sup>a</sup> , n (%)            | 92 (33.1)            | 26 (28.9)            | 66 (35.1)                   | 0.30    |
| <b>Post-treatment SMI (cm<sup>2</sup>/m<sup>2</sup>)</b> | 39.3 $\pm$ 7.6       | 36.0 $\pm$ 6.5       | 40.9 $\pm$ 7.6              | <0.001  |
| Post-treatment sarcopenia <sup>a</sup> , n (%)           | 97 (34.9)            | 44 (48.9)            | 53 (28.2)                   | 0.001   |
| <b>Pre-treatment SMD (HU)</b>                            | 35.6 $\pm$ 9.5       | 35.6 $\pm$ 9.2       | 35.6 $\pm$ 9.6              | 0.84    |
| Pre-treatment myosteotosis <sup>a</sup> , n (%)          | 92 (33.1)            | 31 (34.4)            | 61 (32.4)                   | 0.74    |
| <b>SMD change (%/150 days)</b>                           | -2.9 $\pm$ 12.4      | -11.2 $\pm$ 10.0     | 1.0 $\pm$ 11.5              | <0.001  |
| SMD maintained                                           | 154 (55.4)           | 23 (25.6)            | 131 (69.7)                  | <0.001  |
| SMD loss $\geq$ 5%                                       | 124 (44.6)           | 67 (74.4)            | 57 (30.3)                   |         |
| <b>Pre-treatment TATI (cm<sup>2</sup>/m<sup>2</sup>)</b> | 97.7 $\pm$ 44.5      | 96.9 $\pm$ 47.8      | 98.0 $\pm$ 42.9             | 0.62    |
| Pre-treatment low TATI <sup>a</sup> , n (%)              | 186 (66.9)           | 57 (63.3)            | 129 (68.6)                  | 0.38    |
| <b>TATI change (%/150 days)</b>                          | -3.0 $\pm$ 15.7      | -5.8 $\pm$ 16.5      | -1.7 $\pm$ 15.2             | 0.04    |
| TATI maintained                                          | 153 (55.0)           | 41 (45.6)            | 112 (59.6)                  | 0.03    |
| TATI loss $\geq$ 5%                                      | 125 (45.0)           | 49 (54.4)            | 76 (40.4)                   |         |

Abbreviations: BMI, body mass index; HU, Hounsfield unit; IQR, interquartile range; SMD, skeletal muscle density; SMI, skeletal muscle index; TATI, total adipose tissue index. <sup>a</sup> SMI < 36.3 cm<sup>2</sup>/m<sup>2</sup>,

SMD < 30.7 HU, and TATI < 112.2 cm<sup>2</sup>/m<sup>2</sup> were defined as sarcopenia, myosteatorsis, and low TATI, respectively.

**Supplementary Table S2.** Change of body composition parameters during treatment.

| Variable                                   | First CT scan | Second CT scan | Relative Change per 150 days (%) |               |                 |
|--------------------------------------------|---------------|----------------|----------------------------------|---------------|-----------------|
|                                            | Mean ± SD     | Mean ± SD      | Mean                             | 95% CI        | <i>p</i> -value |
| <b>BMI (kg/m<sup>2</sup>)</b>              |               |                |                                  |               |                 |
| SCC                                        | 23.3 ± 4.4    | 22.9 ± 4.3     | -1.9                             | -2.5 to -1.4  | <0.001          |
| Adenocarcinoma                             | 24.1 ± 3.9    | 23.6 ± 3.7     | -2.0                             | -3.6 to -0.3  | 0.03            |
| <b>SMI (cm<sup>2</sup>/m<sup>2</sup>)</b>  |               |                |                                  |               |                 |
| SCC                                        | 39.9 ± 7.3    | 39.6 ± 7.5     | -0.5                             | -1.6 to 0.7   | 0.45            |
| Adenocarcinoma                             | 39.0 ± 7.2    | 37.3 ± 8.1     | -5.0                             | -9.1 to -0.9  | 0.02            |
| <b>SMD (HU)</b>                            |               |                |                                  |               |                 |
| SCC                                        | 35.6 ± 9.5    | 34.6 ± 9.6     | -2.4                             | -4.0 to -0.9  | 0.002           |
| Adenocarcinoma                             | 35.8 ± 9.2    | 33.5 ± 9.4     | -6.7                             | -11.3 to -2.2 | 0.005           |
| <b>TATI (cm<sup>2</sup>/m<sup>2</sup>)</b> |               |                |                                  |               |                 |
| SCC                                        | 97.7 ± 45.3   | 93.7 ± 42.8    | -3.2                             | -5.2 to -1.1  | 0.002           |
| Adenocarcinoma                             | 97.1 ± 38.3   | 93.7 ± 33.8    | -2.1                             | -7.0 to 2.7   | 0.38            |

SCC, squamous cell carcinoma.

Supplementary Table S3. Patterns of failure according to body composition groups.

|                                     | Distant failure (total) | <i>p</i> -value | Distant failure alone | <i>p</i> -value | Distant plus Pelvic failure | <i>p</i> -value | Pelvic failure alone | <i>p</i> -value |
|-------------------------------------|-------------------------|-----------------|-----------------------|-----------------|-----------------------------|-----------------|----------------------|-----------------|
| <b>Weight change</b>                |                         | 0.63            |                       | 0.81            |                             | 0.70            |                      | 0.35            |
| Weight maintained ( <i>n</i> = 220) | 43 (19.5)               |                 | 35 (15.9)             |                 | 8 (3.6)                     |                 | 7 (3.2)              |                 |
| Weight loss ≥ 5% ( <i>n</i> = 58)   | 13 (22.4)               |                 | 10 (17.2)             |                 | 3 (5.2)                     |                 | 0 (0.0)              |                 |
| <b>SMI change</b>                   |                         | <0.001          |                       | <0.001          |                             | <0.001          |                      | 0.22            |
| SMI maintained ( <i>n</i> = 188)    | 18 (9.6)                |                 | 17 (9.0)              |                 | 1 (0.5)                     |                 | 3 (1.6)              |                 |
| SMI loss ≥ 5% ( <i>n</i> = 90)      | 38 (42.2)               |                 | 28 (31.1)             |                 | 10 (11.1)                   |                 | 4 (4.4)              |                 |
| <b>SMD change</b>                   |                         | <0.001          |                       | 0.02            |                             | 0.003           |                      | 0.25            |
| SMD maintained ( <i>n</i> = 154)    | 19 (12.3)               |                 | 18 (11.7)             |                 | 1 (0.6)                     |                 | 2 (1.3)              |                 |
| SMD loss ≥ 5% ( <i>n</i> = 124)     | 37 (29.8)               |                 | 27 (21.8)             |                 | 10 (8.1)                    |                 | 5 (4.0)              |                 |
| <b>TATI change</b>                  |                         | 0.08            |                       | 0.12            |                             | 0.55            |                      | 0.13            |
| TATI maintained ( <i>n</i> = 153)   | 25 (16.3)               |                 | 20 (13.1)             |                 | 5 (3.3)                     |                 | 6 (3.9)              |                 |
| TATI loss ≥ 5% ( <i>n</i> = 125)    | 31 (24.8)               |                 | 25 (20.0)             |                 | 6 (4.8)                     |                 | 1 (0.8)              |                 |

Abbreviations: SMD, skeletal muscle density; SMI, skeletal muscle index; TATI, total adipose tissue index. Data are expressed as the absolute number of events (%).

**Supplementary Table S4.** Univariable Cox proportional hazards model for 3-year distant recurrence-free survival ( $n = 278$ ).

| <b>Distant recurrence-free survival</b>            |                              |                       |
|----------------------------------------------------|------------------------------|-----------------------|
| <b>Variable</b>                                    | <b>Hazard ratio (95% CI)</b> | <b><i>p</i>-value</b> |
| <b>Age, continuous</b>                             | 1.00 (0.98–1.02)             | 0.92                  |
| <b>ECOG performance status</b>                     |                              |                       |
| 0                                                  | Reference                    |                       |
| 1                                                  | 0.85 (0.30–2.35)             | 0.75                  |
| <b>Pre-treatment BMI, continuous</b>               | 0.99 (0.93–1.06)             | 0.79                  |
| <b>BMI change, per 1%/150 days decrease</b>        | 1.03 (0.97–1.11)             | 0.31                  |
| <b>Weight loss (<math>\geq -5.0\%</math>)</b>      | 1.17 (0.60–2.28)             | 0.65                  |
| <b>Pre-treatment SMI, categorical</b>              |                              |                       |
| Non-sarcopenia                                     | Reference                    |                       |
| Sarcopenia <sup>a</sup>                            | 1.05 (0.58–1.89)             | 0.87                  |
| <b>SMI change, per 1%/150 days decrease</b>        | 1.11 (1.08–1.14)             | <0.001                |
| <b>SMI change, categorical</b>                     |                              |                       |
| SMI maintain                                       | Reference                    |                       |
| SMI loss ( $\geq -5.0\%$ )                         | 7.76 (4.11–14.67)            | <0.001                |
| <b>Pre-treatment SMD, categorical</b>              |                              |                       |
| Non-myosteotosis                                   | Reference                    |                       |
| Myosteotosis <sup>a</sup>                          | 0.94 (0.52–1.71)             | 0.85                  |
| <b>SMD change, per 1%/150 days decrease</b>        | 1.04 (1.01–1.06)             | 0.002                 |
| <b>SMD maintain</b>                                | Reference                    |                       |
| <b>SMD loss (<math>\geq -5.0\%</math>)</b>         | 2.39 (1.34–4.28)             | 0.003                 |
| <b>Pre-treatment TATI<sup>a</sup>, categorical</b> |                              |                       |
| High TATI                                          | Reference                    |                       |
| Low TATI <sup>a</sup>                              | 0.70 (0.39–1.23)             | 0.21                  |
| <b>TATI change, per 1%/150 days decrease</b>       | 1.02 (1.01–1.03)             | 0.04                  |
| <b>TATI maintain</b>                               | Reference                    |                       |
| <b>TATI loss (<math>\geq -5.0\%</math>)</b>        | 1.64 (0.93–2.88)             | 0.09                  |
| <b>FIGO stage</b>                                  |                              |                       |
| IB-II                                              | Reference                    |                       |
| III-IVA                                            | 3.89 (2.21–6.83)             | <0.001                |
| <b>PLNs involvement</b>                            |                              |                       |
| Negative                                           | Reference                    |                       |
| Positive                                           | 2.92 (1.57–5.42)             | 0.001                 |
| <b>Radiation field</b>                             |                              |                       |
| Pelvic radiotherapy                                | Reference                    |                       |
| Extended-field radiotherapy                        | 0.76 (0.43–1.34)             | 0.35                  |
| <b>Pathology</b>                                   |                              |                       |
| Squamous cell carcinoma                            | Reference                    |                       |
| Adenocarcinoma                                     | 3.83 (2.06–7.13)             | <0.001                |
| <b>SCC-Ag level, continuous</b>                    | 1.02 (1.01–1.02)             | <0.001                |
| <b>Chemotherapy</b>                                |                              |                       |
| No                                                 | Reference                    |                       |
| Yes                                                | 1.02 (0.43–2.40)             | 0.96                  |

Abbreviations: BMI, body mass index; CI, confidence interval; ECOG, Eastern Cooperative Oncology Group; FIGO, International Federation of Gynaecology and Obstetrics; HU, Hounsfield unit; PLN, pelvic lymph node; SCC-Ag, squamous cell carcinoma antigen; SMD, skeletal muscle density; SMI, skeletal muscle index; TATI, visceral adipose tissue index. <sup>a</sup> SMI < 36.3 cm<sup>2</sup>/m<sup>2</sup>, SMD < 30.7 HU, and TATI < 112.2 cm<sup>2</sup>/m<sup>2</sup> were defined as sarcopenia, myosteotosis, and low TATI, respectively.

**Supplementary Table S5.** Univariable and multivariable Cox proportional hazards model for 3-year distant recurrence-free survival for patients with squamous cell carcinoma ( $n = 246$ ).

| Variable                                           | Univariable           |                 | Multivariable         |                 |
|----------------------------------------------------|-----------------------|-----------------|-----------------------|-----------------|
|                                                    | Hazard ratio (95% CI) | <i>p</i> -value | Hazard ratio (95% CI) | <i>p</i> -value |
| <b>Age, continuous</b>                             | 1.01 (0.98–1.03)      | 0.55            |                       |                 |
| <b>ECOG performance status</b>                     |                       |                 |                       |                 |
| 0                                                  | Reference             |                 |                       |                 |
| 1                                                  | 1.15 (0.41–3.26)      | 0.79            |                       |                 |
| <b>Pre-treatment BMI, continuous</b>               | 0.97 (0.90–1.06)      | 0.50            |                       |                 |
| <b>Weight loss (<math>\geq -5.0\%</math>)</b>      | 1.38 (0.65–2.94)      | 0.41            |                       |                 |
| <b>Pre-treatment SMI, categorical</b>              |                       |                 |                       |                 |
| Non-sarcopenia                                     | Reference             |                 |                       |                 |
| Sarcopenia                                         | 1.06 (0.53–2.14)      | 0.86            |                       |                 |
| <b>SMI change</b>                                  |                       |                 |                       |                 |
| SMI maintain                                       | Reference             |                 | Reference             |                 |
| SMI loss ( $\geq -5.0\%$ )                         | 6.71 (3.28–13.74)     | <0.001          | 5.86 (2.85–12.08)     | <0.001          |
| <b>Pre-treatment SMD, categorical</b>              |                       |                 |                       |                 |
| Non-myosteotosis                                   | Reference             |                 |                       |                 |
| Myosteotosis                                       | 0.76 (0.37–1.59)      | 0.47            |                       |                 |
| <b>SMD change</b>                                  |                       |                 |                       |                 |
| SMD maintain                                       | Reference             |                 |                       |                 |
| SMD loss ( $\geq -5.0\%$ )                         | 1.69 (0.87–3.28)      | 0.12            |                       |                 |
| <b>Pre-treatment TATI<sup>a</sup>, categorical</b> |                       |                 |                       |                 |
| High TATI                                          | Reference             |                 |                       |                 |
| Low TATI                                           | 0.63 (0.33–1.24)      | 0.18            |                       |                 |
| <b>TATI change</b>                                 |                       |                 |                       |                 |
| TATI maintain                                      | Reference             |                 | Reference             |                 |
| TATI loss ( $\geq -5.0\%$ )                        | 2.26 (1.14–4.48)      | 0.02            | 2.26 (1.11–4.62)      | 0.03            |
| <b>FIGO stage</b>                                  |                       |                 |                       |                 |
| IB-II                                              | Reference             |                 | Reference             |                 |
| III-IVA                                            | 5.00 (2.54–9.84)      | <0.001          | 2.76 (1.35–5.67)      | 0.01            |
| <b>PLNs involvement</b>                            |                       |                 |                       |                 |
| Negative                                           | Reference             |                 | Reference             |                 |
| Positive                                           | 3.35 (1.57–7.15)      | 0.002           | 2.44 (1.09–5.46)      | 0.03            |
| <b>Radiation field</b>                             |                       |                 |                       |                 |
| Pelvic radiotherapy                                | Reference             |                 |                       |                 |
| Extended-field radiotherapy                        | 0.91 (0.47–1.76)      | 0.77            |                       |                 |
| <b>SCC-Ag level, continuous</b>                    | 1.02 (1.01–1.03)      | <0.001          | 1.02 (1.01–1.03)      | <0.001          |
| <b>Chemotherapy</b>                                |                       |                 |                       |                 |
| No                                                 | Reference             |                 |                       |                 |
| Yes                                                | 0.91 (0.35–2.34)      | 0.84            |                       |                 |

Abbreviations: BMI, body mass index; CI, confidence interval; ECOG, Eastern Cooperative Oncology Group; FIGO, International Federation of Gynaecology and Obstetrics; HU, Hounsfield unit; PLN, pelvic lymph node; SCC-Ag, squamous cell carcinoma antigen; SMD, skeletal muscle density; SMI, skeletal muscle index; TATI, total adipose tissue index. <sup>a</sup> SMI < 36.3 cm<sup>2</sup>/m<sup>2</sup>, SMD < 30.7 HU, and TATI < 112.2 cm<sup>2</sup>/m<sup>2</sup> were defined as sarcopenia, myosteotosis, and low TATI, respectively.

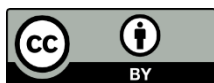

© 2020 by the authors. Licensee MDPI, Basel, Switzerland. This article is an open access article distributed under the terms and conditions of the Creative Commons Attribution (CC BY) license (<http://creativecommons.org/licenses/by/4.0/>).
